# Supplementary material
Source: publisher figshare collection journal article supplement (https://acs.figshare.com/ndownloader/files/14284691)
Supplement: Supplementary file 1 [file 14284691]

## SUPPORTING INFORMATION

### **Solubility Determination and Thermodynamic Modeling for the System NaCl - NH<sub>4</sub>Cl – Diethanolamine - H<sub>2</sub>O**

**Qiaoxin Wang<sup>1,2</sup>, Zhibao Li<sup>1</sup>**

<sup>1</sup>Key Laboratory of Green Process and Engineering, Institute of Process Engineering,  
Chinese Academy of Sciences, Beijing 100190, China.

<sup>2</sup>Dept. of Chemical Engineering, University of Chinese Academy of Sciences, Beijing  
100049, China.

\*Corresponding author: Zhibao Li

\*E-mail: zhibao.li@ipe.ac.cn. Tel./Fax: + 86 10 62551557.

Key Laboratory of Green Process and Engineering, Institute of Process Engineering,  
Chinese Academy of Sciences, Beijing 100190, China.

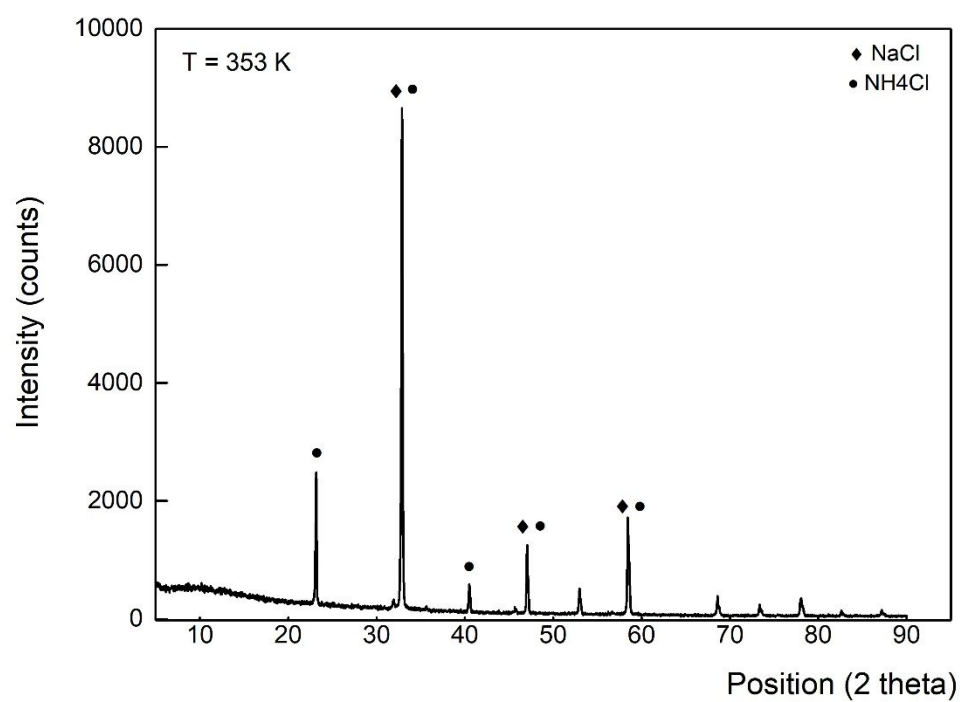

Figure S1. The XRD pattern for the solid obtained at the invariant point; T=333 K.
